# Supplementary material for: Adsorption and separation of amyloid beta aggregates using ferromagnetic nanoparticles coated with charged polymer brushes
Source: Royal Society of Chemistry journal article supplement (doi:10.1039/c4tb02029d), 2015-01-01
Supplement: c4tb02029d1.pdf [file c4tb02029d1.pdf]

## Electronic Supporting Information

For

### **Adsorption and separation of amyloid beta aggregates using ferromagnetic nanoparticles coated with charged polymer brushes**

Tong Bu<sup>a,b</sup>, Tamotsu Zako<sup>\*,b</sup>, Martin Zeltner<sup>c</sup>, Karin M. Sörgjerd<sup>b</sup>, Christoph M. Schumacher<sup>c</sup>, Corinne J. Hofer<sup>c</sup>, Wendelin J. Stark<sup>\*,c</sup> and Mizuo Maeda<sup>\*,a,b</sup>

<sup>a</sup> Department of Advanced Materials Science, School of Frontier Sciences, The University of Tokyo, 5-1-5, Kashiwanoha, Kashiwa, Chiba 277-8561, Japan.

<sup>b</sup> Bioengineering Laboratory, RIKEN Institute, Wako, Saitama 351-0198, Japan.

<sup>c</sup> Institute for Chemical and Bioengineering, Wolfgang-Pauli-Strasse 10, CH-8093 Zurich, Switzerland.

E-mail: [zako@riken.jp](mailto:zako@riken.jp), [mizuo@riken.jp](mailto:mizuo@riken.jp) and [wendelin.stark@chem.ethz.ch](mailto:wendelin.stark@chem.ethz.ch)

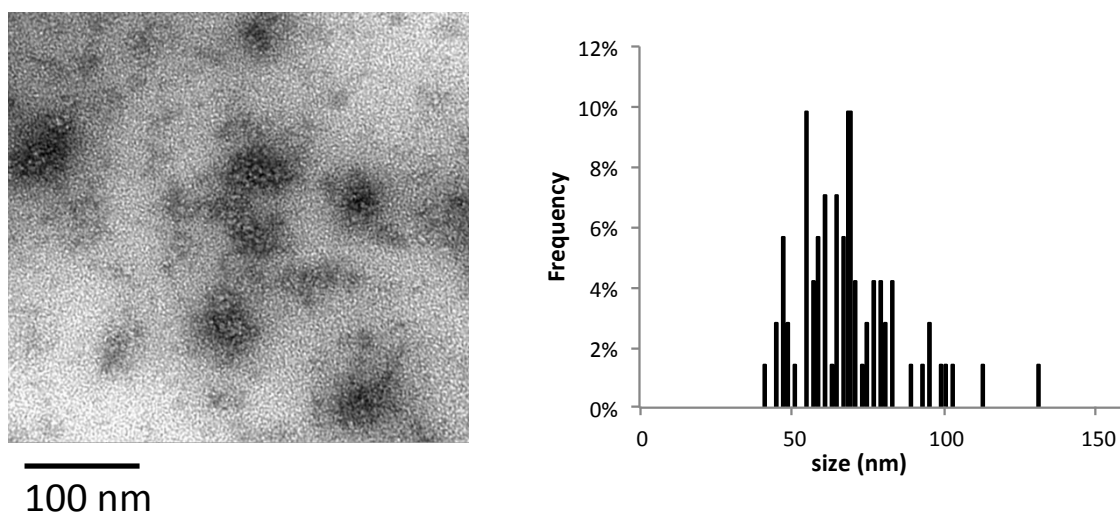

Figure S1 Size of oligomer determined by TEM. (a) TEM image of A $\beta$  oligomer. The A $\beta$  oligomer samples were dropped onto a carbon-coated TEM grid, and the grid was allowed to air-dry. Samarium acetate (2.5%) was used to stain the A $\beta$  oligomer sample. Samples were observed at an excitation voltage of 80 kV using a JEM-1230 transmission electron microscope (JEOL, Tokyo, Japan). (b) The histogram demonstrates the size distribution of A $\beta$  oligomers. Size of oligomers was determined by ImageJ software. The average size of oligomers is about 70 nm ( $67 \pm 17$  nm).

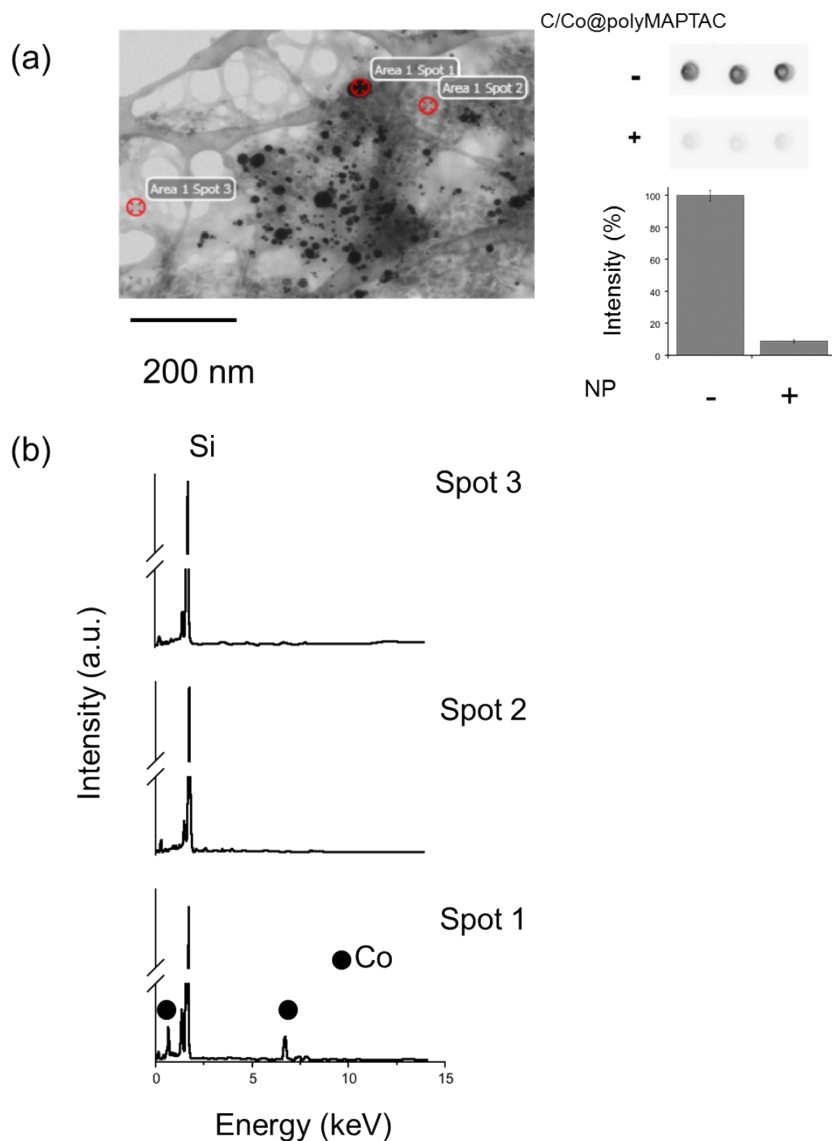

Figure S2 a) The interaction between  $A\beta_{1-40}$  fibrils and C/Co@polyMAPTAC was confirmed by scanning transmission electron microscopy (STEM).  $A\beta_{1-40}$  peptide (Bachem, Bubendorf, Switzerland) dissolved in DMSO (1 M) was diluted in PBS (25  $\mu$ M) and incubated at 37°C for 20 hrs. STEM images of 12.5 $\mu$ M  $A\beta_{1-40}$  fibrils and 50  $\mu$ g/mL NP was taken with Nova NANOSEM 450 (left, FEI, Oregon, USA). The scale bar= 200 nm (Left). Red circles are areas used for energy dispersive X-ray spectroscopy (EDX) determination as described below. Results of dot blot assay (right, upper) and derived bar graphs (right, lower) for quantification of the adsorption of C/Co@polyMAPTAC to  $A\beta_{1-40}$  fibrils, were also shown. b), The identification of cobalt in the STEM image was carried out via EDX. Three areas were chosen for the detection, where spot 1 represented NP area, spot 2 represented  $A\beta_{1-40}$  fibrils area, and spot 3 was grid only area. The characteristic peak of cobalt in the EDX-spectra appeared only in spot 1, indicating that dark spots on the STEM image was C/Co@polyMAPTAC.

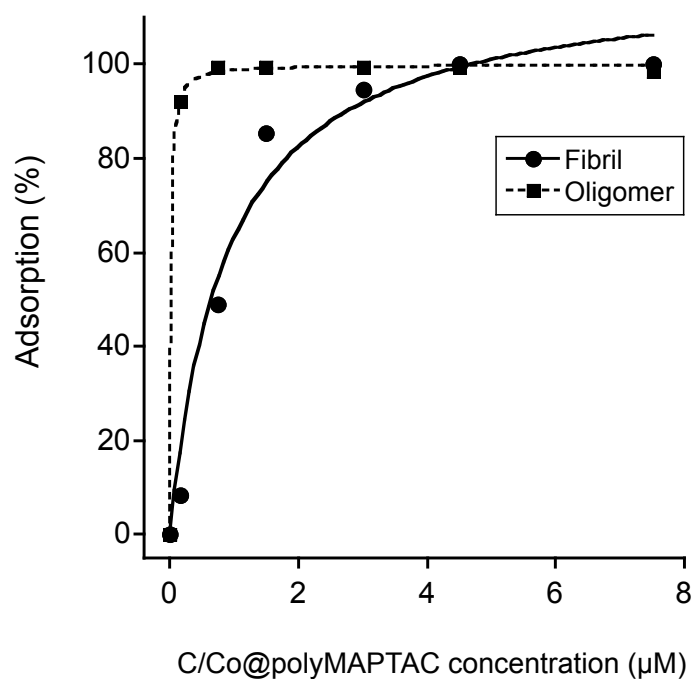

Figure S3 Affinity of C/Co@polyMAPTAC to A $\beta$  fibrils and oligomers were estimated using the adsorption ratio (%) against various NP concentrations obtained from Fig.2b (fibrils) and Fig.3c (oligomers). The molar concentration of C/Co@polyMAPTAC was calculated assuming the nanoparticle mol/weight is 0.15 mmol/g, which was obtained by the element microanalysis (Zeltner, M. et al. *J. Mat. Chem.* (2012) 22, 12064-71).

The  $K_d$  ( $\mu$ M) values were fitted using the following equation;

$$\text{Adsorption ratio(\%)} = A_0 * [\text{NP}] / (K_D + [\text{NP}])$$

Then  $K_d$  values for fibrils and oligomers were calculated to be 0.87  $\mu$ M and 12 nM, respectively.

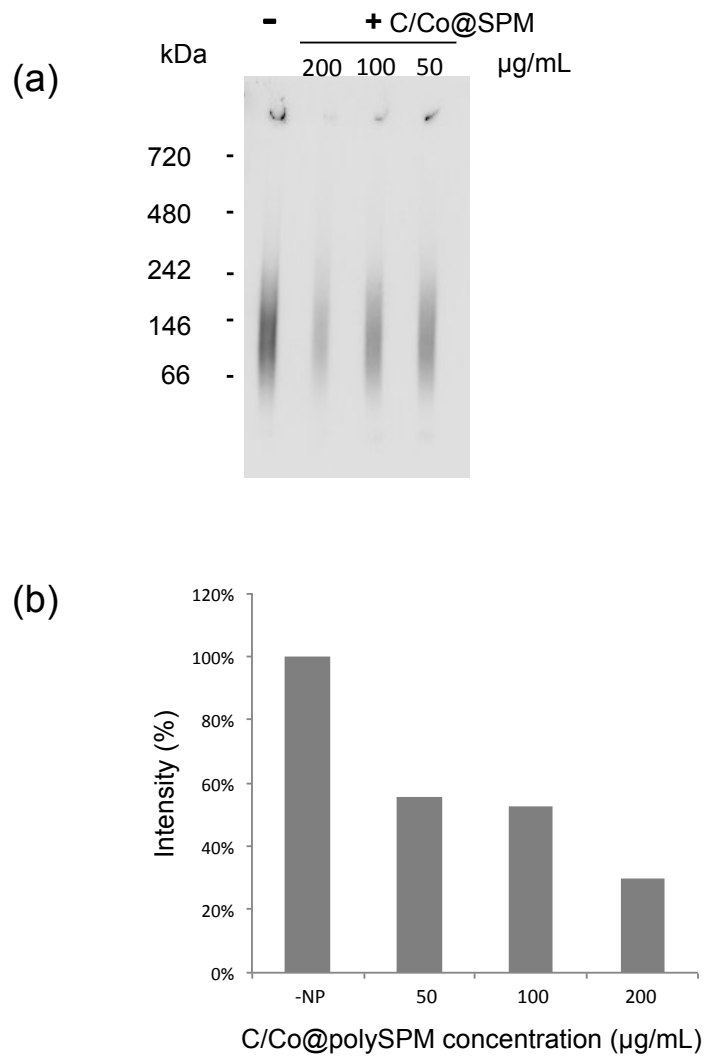

Figure S4 (a), The adsorption and separation of A $\beta$  oligomers by C/Co@polySPM was confirmed by native PAGE/Western blot method. For the analysis, A $\beta$  oligomer (12.5  $\mu$ M) was incubated with C/Co@polySPM (0, 50, 100, 200  $\mu$ g/mL) for 1 h. The supernatant after magnetic separation was subjected to the native PAGE/Western blot analysis. (b), The adsorption of oligomers onto NPs was quantified using the relative intensity of oligomers on the membrane. The intensities of the samples without C/Co@polySPM were normalized to 100%.
